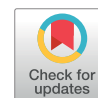

# Excessive Weight Gain Before and During Gestational Diabetes Mellitus Management: What Is the Impact?

*Diabetes Care* 2020;43:74–81 | <https://doi.org/10.2337/dc19-0800>

Robyn A. Barnes,<sup>1,2</sup> Tang Wong,<sup>1,3,4</sup>  
Glynis P. Ross,<sup>1,4</sup> Michelle M. Griffiths,<sup>1</sup>  
Carmel E. Smart,<sup>2,5</sup> Clare E. Collins,<sup>2,6</sup>  
Lesley MacDonald-Wicks,<sup>2,6</sup> and  
Jeff R. Flack<sup>1,3,7</sup>

## OBJECTIVE

Conventional gestational diabetes mellitus (GDM) management focuses on managing blood glucose in order to prevent adverse outcomes. We hypothesized that excessive weight gain at first presentation with GDM (excessive gestational weight gain [EGWG]) and continued EGGW (cEGWG) after commencing GDM management would increase the risk of adverse outcomes, despite treatment to optimize glycemia.

## RESEARCH DESIGN AND METHODS

Data collected prospectively from pregnant women with GDM at a single institution were analyzed. GDM was diagnosed on the basis of Australasian Diabetes in Pregnancy Society 1998 guidelines (1992–2015). EGGW means having exceeded the upper limit of the Institute of Medicine–recommended target ranges for the entire pregnancy, by GDM presentation. The relationship between EGGW and antenatal 75-g oral glucose tolerance test (oGTT) values and adverse outcomes was evaluated. Relationships were examined between cEGWG, insulin requirements, and large-for-gestational-age (LGA) infants.

## RESULTS

Of 3,281 pregnant women, 776 (23.6%) had EGGW. Women with EGGW had higher mean fasting plasma glucose (FPG) on oGTT (5.2 mmol/L [95% CI 5.1–5.3] vs. 5.0 mmol/L [95% CI 4.9–5.0];  $P < 0.01$ ), after adjusting for confounders, and more often received insulin therapy (47.0% vs. 33.6%;  $P < 0.0001$ ), with an adjusted odds ratio (aOR) of 1.4 (95% CI 1.1–1.7;  $P < 0.01$ ). aORs for each 2-kg increment of cEGWG were a 1.3-fold higher use of insulin therapy (95% CI 1.1–1.5;  $P < 0.001$ ), an 8-unit increase in final daily insulin dose (95% CI 5.4–11.0;  $P < 0.0001$ ), and a 1.4-fold increase in the rate of delivery of LGA infants (95% CI 1.2–1.7;  $P < 0.0001$ ).

## CONCLUSIONS

The absence of EGGW and restricting cEGWG in GDM have a mitigating effect on oGTT-based FPG, the risk of having an LGA infant, and insulin requirements.

The traditional approach to gestational diabetes mellitus (GDM) management largely focuses on monitoring and treating maternal hyperglycemia. This practice is supported by evidence of fewer adverse maternal and neonatal outcomes with improved glycemic control during pregnancy (1,2). Medical nutrition therapy (MNT) is first-line treatment, and insulin is commenced if MNT is not sufficient to achieve

<sup>1</sup>Diabetes Centre, Bankstown-Lidcombe Hospital, New South Wales, Australia

<sup>2</sup>School of Health Sciences, Faculty of Health and Medicine, University of Newcastle, Callaghan, New South Wales, Australia

<sup>3</sup>Faculty of Medicine, University of New South Wales, Sydney, New South Wales, Australia

<sup>4</sup>Faculty of Medicine and Health, University of Sydney, Sydney, New South Wales, Australia

<sup>5</sup>Department of Paediatric Endocrinology and Diabetes, John Hunter Children's Hospital, Newcastle, New South Wales, Australia

<sup>6</sup>Priority Research Centre in Physical Activity and Nutrition, University of Newcastle, Callaghan, New South Wales, Australia

<sup>7</sup>School of Medicine, Western Sydney University, Sydney, New South Wales, Australia

Corresponding author: Robyn A. Barnes, [robyn.barnes2@health.nsw.gov.au](mailto:robyn.barnes2@health.nsw.gov.au)

Received 23 April 2019 and accepted 11 October 2019

© 2019 by the American Diabetes Association. Readers may use this article as long as the work is properly cited, the use is educational and not for profit, and the work is not altered. More information is available at <http://www.diabetesjournals.org/content/license>.

glycemic targets. However, some studies have shown that women treated with insulin do not have lower rates of adverse pregnancy outcomes than women treated with MNT (3,4). Although this may be due to differences in prepregnancy BMI, maternal glycemia, or both (3), it is also possible that other clinical nonglycemic variables may contribute. Excessive weight gain before the GDM diagnosis and throughout pregnancy may drive the increasing insulin resistance and further exacerbate maternal hyperglycemia (2,3). Greater fat deposition may reduce the capacity to compensate for the physiological increases in insulin resistance that occur during pregnancy (5). A meta-analysis of over 1 million pregnant women found that gestational weight gain was higher than that specified in Institute of Medicine (IOM) guidelines (6) in 47% of pregnancies (7). Some studies have found that women who have GDM and are obese before pregnancy are even more likely to exceed these targets (8,9). Cundy and Holt (10) reported that "it is often under-recognized that the morbidities attributed to GDM are also strongly associated with maternal obesity and excessive gestational weight gain." However, evidence is limited on whether preventing excessive weight gain before and during GDM management results in improved maternal and neonatal outcomes.

In light of this gap in evidence and the rising global rates of GDM, maternal overweight and obesity, and excessive maternal weight gain, research is needed assessing both the impact of excessive gestational weight gain (EGWG) before GDM diagnosis and EGWG that continues during GDM management (cEGWG).

Therefore, the aim of this study was, first, to determine whether women who were diagnosed with GDM and had EGWG at GDM presentation also had higher rates of adverse outcomes (maternal and neonatal) and higher glucose levels per an antenatal 75-g oral glucose tolerance test (oGTT). EGWG in this study was defined as exceeding the upper limit of an IOM-recommended maternal weight gain target range for the entire pregnancy (6) (based on self-reported prepregnancy weight) by the time of the first presentation to the Diabetes Centre for GDM management. For example, if a patient with a prepregnancy BMI of 28 kg/m<sup>2</sup> first presented to the Diabetes

Centre at 30 weeks' gestation having already gained 14 kg, she would be categorized as having EGWG, as the weight gain exceeds the advised maximum weight gain of 11.6 kg for the entire pregnancy for a woman with a prepregnancy BMI in the overweight category (25.0–29.9 kg/m<sup>2</sup>).

The second aim was to investigate whether cEGWG in women with EGWG was associated with the most pertinent outcomes identified from the first aim: greater likelihood of initiating insulin, a larger mean insulin dose, and having an infant that is large for gestational age (LGA). cEGWG was measured from the first presentation to the Diabetes Centre in order to commence GDM management to the last recorded weight (within 4 weeks of delivery).

## RESEARCH DESIGN AND METHODS

The study population comprised women with GDM managed at the Bankstown-Lidcombe Hospital Diabetes Centre. Women were diagnosed according to the Australasian Diabetes in Pregnancy Society 1998 guidelines (11), which have been in use since 1991 (12). These guidelines were fasting plasma glucose (FPG)  $\geq 5.5$  mmol/L ( $\geq 99$  mg/dL), 2-h postload glucose  $\geq 8.0$  mmol/L ( $\geq 144$  mg/dL) on a 75-g oGTT, or both. A 1-h postload value  $\geq 10.0$  mmol/L ( $\geq 18$  mg/dL) on the oGTT was also considered diagnostic for GDM from 2010 onward.

The data analyzed in this study were clinical data collected prospectively as part of routine care for all pregnant women with GDM (1992–2015). The Diabetes Centre at Bankstown-Lidcombe Hospital is situated in a metropolitan region in Sydney, New South Wales (NSW), characterized by ethnic diversity; a significant proportion of the women with GDM within the clinic population have Middle Eastern (26.1%), East and Southeast Asian (35.2%), and South Asian (12.5%) backgrounds.

Clinical care of women with GDM included provision of initial education (group or individual) by a dietitian and diabetes educator. This usually occurred between 26 and 28 weeks' gestation but could take place at any time during the pregnancy. Height was measured with a stadiometer (KaWe wall-mounted height measure, model 44440; Medical World Ltd, West Bromwich, U.K.), and prepregnancy weight was self-reported at the

initial education session. Weight was measured at every visit (BWB-600 Digital Patient Medical Scale; Tanita, Tokyo, Japan). After receiving the initial education, for the remainder of the pregnancy women were managed in a multidisciplinary GDM clinic, where their case was reviewed by a diabetes educator and endocrinologist at 1- to 2-week intervals. Each woman received a minimum of one individual dietary review from a dietitian. Blood glucose levels were reviewed at each visit, and insulin therapy commenced and was titrated when MNT did not achieve glycemic targets ( $<5.5$  mmol/L [99 mg/dL] fasting glucose and  $<7.0$  mmol/L [126 mg/dL] 2-h postprandial glucose) (11). Three or more blood glucose levels above the target at a given time of day over 7 days, after consideration of dietary factors, indicated a need for insulin therapy. The insulins used were the intermediate-acting human NPH insulin protaphane and the rapid-acting analogs insulin aspart (NovoRapid; Novo Nordisk, Baulkham Hills, NSW, Australia) and insulin lispro (Humalog; Eli Lilly, West Ryde, NSW, Australia). Metformin was not used.

Postpartum (8–12 weeks) 75-g oGTT results were assessed by using the following criteria: impaired fasting glycemia was defined as fasting glucose 6.1–6.9 mmol/L (109–125 mg/dL); impaired glucose tolerance was defined as 7.8–11.0 mmol/L 2 h after a 75-g glucose load (140–199 mg/dL); type 2 diabetes was defined as fasting glucose  $\geq 7.0$  mmol/L (126 mg/dL), glucose  $\geq 11.1$  mmol/L (200 mg/dL) 2 h after a 75-g oGTT, or both.

The primary outcome of the study was the need for insulin therapy. Insulin therapy was selected as a primary outcome because of the health care resource implications of initiating and titrating insulin, and because of the significantly higher stress and anxiety levels reported in women treated with insulin than in those treated only by managing diet (13).

Gestational age was initially determined from the date of the last menstrual period. However, if an ultrasound indicated a different gestational age, the estimated date of confinement and the gestational age were amended.

The inclusion criterion for aim 1 of this study was a diagnosis of GDM. Exclusion criteria included 1) the last record of maternal weight dated  $>4$  weeks before

delivery, 2) incomplete weight gain data, and 3) nonsingleton pregnancies.

The inclusion criterion for aim 2 was weight gain exceeding the IOM-recommended ranges (according to prepregnancy BMI) at GDM presentation (EGWG):  $\geq 18.1$  kg for women with a BMI  $\leq 18.5$  kg/m<sup>2</sup>;  $\geq 16.1$  kg for those with a BMI of 18.5–24.9 kg/m<sup>2</sup>;  $\geq 11.6$  kg for those with a BMI of 25.0–29.9 kg/m<sup>2</sup>; or  $\geq 9.1$  kg for women with a BMI  $\geq 30.0$  kg/m<sup>2</sup>. Exclusion criteria were 1) the last record of maternal weight dated  $>4$  weeks before delivery, 2) incomplete weight gain data, 3) nonsingleton pregnancies, and 4) no EGWG at presentation.

Neonates were categorized on the basis of their birth weight as LGA ( $>90$ th percentile) or small for gestational age (SGA) ( $<10$ th percentile) by referencing the customized percentile charts described by Gardosi and Francis (14). These charts adjusted for gestational age, infant sex, maternal height, self-reported maternal prepregnancy weight, parity, and ethnicity.

To determine whether EGWG at GDM presentation impacted clinical outcomes, odds ratios (ORs) were calculated for risk of the following outcomes: insulin therapy, early delivery, LGA infant, SGA infant, cesarean delivery, neonatal hypoglycemia, neonatal shoulder dystocia, neonatal jaundice, and maternal abnormal glucose tolerance postpartum. The reference group comprised women who did not have EGWG at GDM presentation. Backward stepwise logistic regression analysis was conducted in order to calculate an adjusted OR (aOR) for each of these adverse outcomes, adjusting for biologically plausible confounders. Potential confounders included in univariate analyses were 75-g oGTT FPG and 2-h postload glucose values, HbA<sub>1c</sub> at GDM diagnosis, gestational age at diagnosis, gravida, parity, ethnicity (Middle Eastern, European, East/Southeast Asian, South Asian), and vitamin D. Predictors of insulin therapy were then entered into a logistic regression model. The following confounders were found to be independent predictors in the logistic regression analysis and hence were used to calculate aOR: 75-g oGTT FPG; HbA<sub>1c</sub> at GDM diagnosis; gestational age at diagnosis; parity; and Middle Eastern, European, and South-east Asian ethnicities. The associated

95% CIs were calculated for each OR and aOR.

Patient characteristics and therapeutic, maternal, and neonatal outcomes were compared between study groups (women with EGWG vs. those with no EGWG at GDM presentation) by using the independent samples *t* test for continuous data and the Pearson  $\chi^2$  test for categorical data. The Fisher-Freeman-Halton exact test was used to assess differences in ethnicity. Statistical significance was represented by a *P* value  $<0.05$ .

An independent samples *t* test was used to determine whether 75-g oGTT FPG values differed between study groups (women with EGWG vs. those with no EGWG at GDM presentation); this difference was adjusted for in the multivariable analysis by using ANCOVA. In order to calculate adjusted mean 75-g oGTT FPG values, potential confounders were included in univariate analyses. These were the 2-h postload glucose value, HbA<sub>1c</sub> at GDM diagnosis, gestational age at diagnosis, gravida, parity, ethnicity (Middle Eastern, European, East/Southeast Asian, South Asian), and vitamin D. Independent predictors of mean 75-g oGTT FPG values were then included in the ANCOVA. Backward selection was used to determine the final model.

cEGWG in women with EGWG was assessed incrementally: 0.1–2.0, 2.1–4.0, 4.1–6.0, 6.1–8.0, and  $>8.0$  kg. Women who stopped gaining weight were used as the reference group ( $\leq 0$  kg). Two-kilogram increments were chosen for practical reasons, as smaller weight changes would be more influenced by factors such as clothing and hydration, rather than changes in adiposity. The reference group (category 1,  $\leq 0$  kg) was chosen to assess whether advising women with EGWG to avoid or minimize further weight gain while managing GDM could reduce adverse outcomes and the likelihood of requiring insulin therapy. cEGWG was measured from first presentation at the Diabetes Centre (to commence GDM management) to the last recorded weight (within 4 weeks of delivery).

Logistic regression analyses were performed to determine whether cEGWG was an independent predictor of insulin therapy. Factors considered in the univariate analysis were age, FPG and 2-h

postload values on the 75-g oGTT, gestational age at GDM diagnosis, HbA<sub>1c</sub> at GDM diagnosis, gravida, parity, vitamin D status, and the four main ethnicities in this cohort (Middle Eastern, European, East/Southeast Asian, South Asian). Variables found to be significant predictors of receipt of insulin therapy in the univariate analysis ( $P < 0.05$ ) were initially included in the model. The final model was created by using the backward stepwise selection method.

Further analysis through ANCOVA was also conducted to determine whether cEGWG was an independent predictor of final daily insulin dose. Final insulin dose was defined as the total units per day as of the final clinic visit before delivery (within 4 weeks of delivery, per inclusion criteria for aim 2).

As the primary outcome of this study was insulin treatment, the independent predictors for risk of requiring insulin therapy in the multivariable analysis were used to adjust for the risk of the infant being LGA and the impact on final daily insulin dose.

SPSS Statistics software (version 22.0; IBM, Chicago, IL) was used for all data analyses. Ethical approval for this study was given by the South Western Sydney Local Health District Research and Ethics Committee.

## RESULTS

Of 3,343 pregnancies, 3,281 were in women with GDM who met the inclusion criterion for aim 1. A total of 776 women (23.6%) had EGWG—that is, they already exceeded the IOM-recommended maternal weight gain targets for the entire pregnancy at first presentation with GDM (mean  $\pm$  SD 27.7  $\pm$  4.2 weeks' gestation)—and met the inclusion criterion for aim 2.

### Outcomes: Presence Versus Absence of EGWG at First Presentation With GDM

The oGTTs were performed at a median of 28.0 weeks' gestation (interquartile range, 26–30 weeks) for pregnant women with EGWG and 27.0 weeks (interquartile range, 22–29 weeks) for those with no EGWG ( $P = 0.201$ ). Women with EGWG before GDM diagnosis had a clinically and statistically significantly higher FPG than women without EGWG when presenting for the 75-g oGTT—5.4  $\pm$  0.8 mmol/L (97.0  $\pm$  14.4 mg/dL) vs.

5.0 ± 0.7 mmol/L (90.0 ± 13.0 mg/dL) ( $P < 0.0001$ )—but a significantly lower 2-h postload value (8.6 ± 1.7 mmol/L [155 ± 31 mg/dL] vs. 8.7 ± 1.4 mmol/L [157 ± 25 mg/dL]) ( $P < 0.01$ ). In the ANCOVA, after adjusting for confounders (HbA<sub>1c</sub> at GDM diagnosis [ $P < 0.0001$ ]; vitamin D [ $P < 0.0001$ ]; and Middle Eastern [ $P < 0.0001$ ], European [ $P < 0.0001$ ], and Southeast Asian [ $P < 0.0001$ ] ethnicities), FPG remained significantly higher: 5.2 mmol/L (95% CI 5.1–5.3) (94 mg/dL [95% CI 92–95]) versus 5.0 mmol/L (95% CI 4.9–5.0) (90.0 mg/dL [95% CI 88–90]) ( $P < 0.01$ ). There was no difference in the 2-h postload value.

Table 1 summarizes the characteristics of women with EGWG at presentation to the Diabetes Centre and of those who did not have EGWG. Those with EGWG had significantly higher prepregnancy BMI, older gestational age at diagnosis, higher FPG on the oGTT, and higher HbA<sub>1c</sub> at GDM presentation.

Women with EGWG at GDM presentation delivered at 39.0 ± 1.2 weeks' gestation; those with no EGWG at GDM presentation delivered at 39.0 ± 1.3 weeks ( $P = 0.566$ ). A 75-g oGTT was completed at a mean ± SD of 9.4 ± 2.1 weeks postpartum among women with EGWG at presentation with GDM ( $n = 395$ ) and at 9.6 ± 2.6 weeks postpartum for women with no EGWG at presentation with GDM ( $n = 1,524$ ) ( $P = 0.201$ ).

As shown in Table 2, insulin therapy and adverse maternal and neonatal outcomes (including LGA, SGA, cesarean delivery, and neonatal hypoglycemia) occurred significantly more frequently among women with EGWG. However, once we adjusted for confounders, only the relationships between EGWG and insulin use, LGA, SGA, and cesarean delivery remained significant.

### Outcomes from cEGWG During GDM Management

Figure 1 displays the linear relationship between the percentage of women requiring insulin and incremental cEGWG during GDM treatment. Women who gained no weight or who lost weight during GDM management formed the reference group (mean ± SD weight change was  $-1.9 \pm 1.7$  kg). A total of 204 women were in the reference group, and so, by definition, all lost weight ( $\geq 0.1$  kg; range 0.1–9.7 kg). A total of 120 women were defined as having clinically significant weight loss of  $\geq 1$  kg (considering they were weighed while wearing clothing and shoes). However, the majority of women in the reference group ( $n = 137$ ; 67%) lost  $\leq 2$  kg, and only 10 women lost what could be perceived as a large amount of weight ( $\geq 4.0$  kg).

In assessing the relationship between cEGWG and commencement of insulin therapy in the univariate analysis, maternal age, FPG, 2-h postload glucose

value (on a 75-g oGTT), HbA<sub>1c</sub> and gestational age at GDM diagnosis, gravida, parity, cEGWG, and (only) East/Southeast Asian ethnicity were significantly associated with insulin therapy (all  $P < 0.05$ ). When entered into a logistic regression model (backward stepwise method), age ( $P < 0.011$ ), gestational age at GDM diagnosis ( $P < 0.0001$ ), FPG on oGTT ( $P < 0.0001$ ), HbA<sub>1c</sub> at GDM diagnosis ( $P < 0.0001$ ), and cEGWG ( $P < 0.0001$ ) were independent predictors of insulin therapy, whereas 2-h postload glucose, gravida, parity, and East/Southeast Asian ethnicity were no longer significant.

For every increase in cEGWG category (0.1–2.0, 2.1–4.0, 4.1–6.0, 6.1–8.0,  $>8.0$  kg), there was a 1.39-fold increase in the likelihood of requiring insulin therapy (95% CI 1.24–1.56;  $P < 0.0001$ ). After adjustment for the independent predictors in the logistic regression analysis (age, gestational age at diagnosis, FPG value on a 75-g oGTT, HbA<sub>1c</sub> at GDM diagnosis), this was slightly attenuated to a 1.32-fold increase in the likelihood of insulin therapy (95% CI 1.14–1.53;  $P < 0.001$ ) for each increase in cEGWG category.

Further, on univariate analysis, for every increase in cEGWG category, there was a 1.36-fold increase in the likelihood of an infant being LGA (95% CI 1.20–1.54 units;  $P < 0.0001$ ). On multivariable logistic regression analysis (again after

**Table 1—Baseline characteristics of women with and those without EGWG at presentation for GDM management ( $N = 3,281$ )**

| Patient characteristics                            | EGWG at presentation<br>( $n = 776$ ) | No EGWG at presentation<br>( $n = 2,505$ ) | $P$ value* |
|----------------------------------------------------|---------------------------------------|--------------------------------------------|------------|
| Age (years)                                        | 31.8 ± 5.6                            | 32.3 ± 5.3                                 |            |
| Gravida                                            | 3.2 ± 2.1                             | 2.9 ± 1.8                                  | <0.0001    |
| Parity                                             | 1.6 ± 1.7                             | 1.3 ± 1.4                                  | <0.0001    |
| Gestational age at diagnosis (weeks)               | 27.7 ± 4.2                            | 25.2 ± 6.0                                 | <0.0001    |
| Prepregnancy BMI (kg/m <sup>2</sup> )              | 29.2 ± 6.0                            | 25.4 ± 6.3                                 | <0.0001    |
| Weight gain up to presentation (kg)                | 16.3 ± 5.0                            | 7.7 ± 4.2                                  | 0.0001     |
| Total maternal weight gained during gestation (kg) | 18.0 ± 5.8                            | 10.3 ± 4.7                                 | 0.0001     |
| Ethnicity                                          |                                       |                                            | <0.0001    |
| Middle Eastern                                     | 310 (39.9)                            | 546 (21.8)                                 |            |
| European                                           | 232 (29.9)                            | 475 (19.0)                                 |            |
| East/Southeast Asian                               | 99 (12.8)                             | 1,055 (42.1)                               |            |
| South Asian                                        | 71 (9.1)                              | 338 (13.5)                                 |            |
| Other                                              | 64 (8.2)                              | 91 (3.7)                                   |            |
| FPG on oGTT (mmol/L [mg/dL])                       | 5.4 ± 0.8 [97.2 ± 14.4]               | 5.0 ± 0.7 [90.0 ± 12.6]                    | <0.0001    |
| 2-h plasma glucose on oGTT (mmol/L [mg/dL])        | 8.6 ± 1.7 [154.8 ± 30.6]              | 8.7 ± 1.4 [156.6 ± 25.2]                   | <0.010     |
| HbA <sub>1c</sub> at GDM diagnosis (% [mmol/mol])  | 5.5 ± 0.7 [37.0 ± 7.7]                | 5.2 ± 0.5 [33.0 ± 5.5]                     | <0.0001    |

Data are  $n$  (%) or mean ± SD. \*EGWG vs. no EGWG at presentation.

**Table 2—Therapeutic and neonatal outcomes in women with and those without EGWG at presentation for GDM management (N = 3,281)**

| Outcomes                              | EGWG at presentation<br>(n = 776 [23.2%]) | No EGWG at presentation<br>(n = 2,505 [74.9%]) | Unadjusted OR (95% CI) | aOR (95% CI)         |
|---------------------------------------|-------------------------------------------|------------------------------------------------|------------------------|----------------------|
| <b>Therapeutic outcome</b>            |                                           |                                                |                        |                      |
| Insulin use                           | 365/776 (47.0)                            | 842/2,505 (33.6)‡                              | 1.754‡ (1.489–2.066)   | 1.393* (1.132–1.715) |
| <b>Neonatal outcomes</b>              |                                           |                                                |                        |                      |
| LGA infants                           | 169/776 (21.8)                            | 283/2,505 (11.3)‡                              | 2.186‡ (1.771–2.699)   | 1.645‡ (1.281–2.112) |
| SGA infant                            | 41/776 (5.3)                              | 215/2,505 (8.6%)‡                              | 0.588* (0.417–0.830)   | 0.503* (0.369–0.810) |
| Cesarean delivery                     | 245/772 (31.7)                            | 627/2,501 (25.1)†                              | 1.389† (1.165–1.658)   | 1.556† (1.206–1.921) |
| Neonatal hypoglycemia                 | 65/679 (9.6)                              | 133/2,275 (5.8)†                               | 1.705† (1.251–2.324)   | 1.137 (0.776–1.664)  |
| Shoulder dystocia                     | 5/679 (0.7)                               | 13/2,275 (0.6)                                 | 1.291 (0.459–3.634)    | 2.010 (0.521–7.755)  |
| Jaundice                              | 61/679 (9.0)                              | 242/2,275 (10.6)                               | 0.829 (0.617–1.114)    | 0.812 (0.73–1.149)   |
| Early delivery                        | 31/776 (4.0)                              | 109/2,502 (4.4)                                | 0.914 (0.608–1.373)    | 1.096 (0.663–1.813)  |
| Abnormal glucose tolerance postpartum | 98/393 (24.9)                             | 428/1,523 (28.1)                               | 0.850 (0.659–1.096)    | 0.934 (0.686–1.274)  |

Data are n/N (%). aORs were adjusted for confounders. Complete data were not available for some variables (N). The following confounders were included in univariate analysis: gravida, parity, gestational age at diagnosis, FPG and 2-h postload glucose based on 75-g oGTT, HbA<sub>1c</sub> at GDM diagnosis, ethnicity (Middle Eastern, European, East/Southeast Asian, South Asian), and vitamin D. In the final model, the following confounders remained significant independent predictors and therefore were used to calculate aOR: gravida; gestational age at diagnosis; FPG per the 75-g oGTT; HbA<sub>1c</sub> at GDM diagnosis; parity; and Middle Eastern, European, and Southeast Asian ethnicities. \*P < 0.01, †P < 0.001, and ‡P < 0.0001, all EGWG vs. no EGWG at presentation.

adjustment for maternal age, FPG on a 75-g oGTT, gestational age at GDM diagnosis, gravida, and HbA<sub>1c</sub> at GDM diagnosis), for every increase in cEGWG category there was a 1.44-fold increase in the likelihood of an infant being born LGA (95% CI 1.24–1.68 units; P < 0.0001).

In terms of insulin dose, for every increase in cEGWG category there was an 11-unit increase in the final daily insulin dose (95% CI 8–15 units; P < 0.0001). This remained significant in the multivariable analysis (ANCOVA) after

adjustment for the aforementioned confounders: for every increase in weight gain category there was an 8-unit increase in the final daily insulin dose (95% CI 5–11 units; P < 0.0001).

There was no significant difference in the rate of infants being SGA between the reference group (women who gained no weight or who lost weight during GDM management; 7.0%) and the women who had cEGWG during GDM treatment (4.6%; P = 0.192). There were also no significant differences in rates of infants

being SGA across all increments of weight gain during GDM management (95% CI 0.8–1.0; P = 0.124).

## CONCLUSIONS

This study of prospectively collected clinical data from 3,281 pregnant women with GDM from the Bankstown-Lidcombe Hospital Diabetes Centre identified strong associations between maternal weight gain and a number of clinically important outcomes including higher insulin requirements and the likelihood of delivering an LGA infant.

The percentage of women who exceeded the upper limit of the IOM weight gain targets for the entire pregnancy by the first presentation for GDM management was high at 23.6%. This study is consistent with a systematic review of 23 studies (7), which found that women with EGWG had a significantly higher rate of cesarean delivery, infant birth weight, and rate of delivering an LGA infant. In this study, these higher values occurred despite treatment of hyperglycemia. Although some weight gain during pregnancy is physiological (15), excessive weight gain leads to the deposition of more fat mass in the mother. This greater adiposity is likely to exacerbate insulin resistance as pregnancy progresses, and it may explain many of the associations found in this study. Few women achieve current IOM targets (8–10). However, a recent U.S. study found that only 26.3% of women received advice on gestational

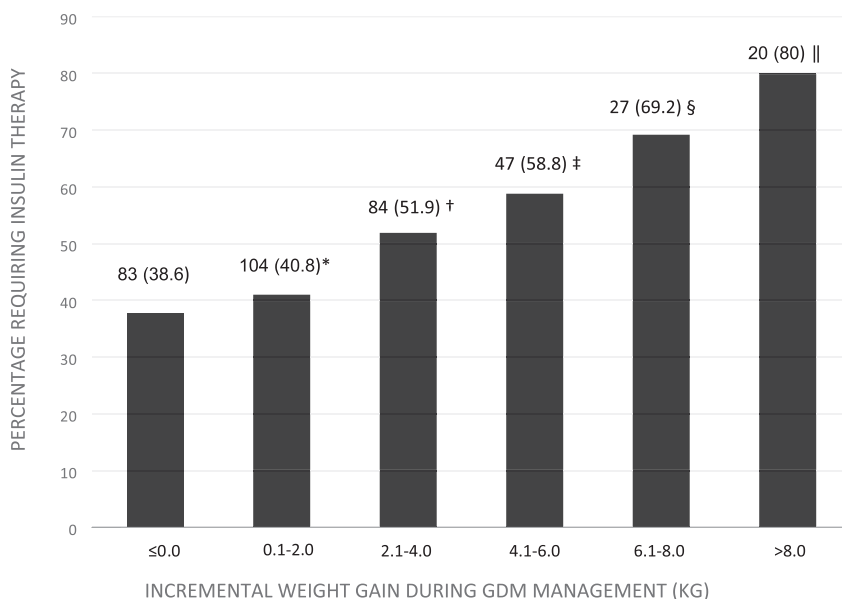

**Figure 1—**Women with GDM who required insulin, based on the amount of cEGWG. The values above each bar are the specific n (%). \*NS, †P < 0.05, ‡P < 0.01, §P < 0.001, and ||P < 0.0001, all vs. ≤0 kg cEGWG (reference group).

weight gain according to IOM guidelines (16). There seems to be a lack of targeted and tailored maternal weight management interventions of appropriate intensity.

There were significant differences in rates of EGWG between ethnic groups (Table 1). Women from European and Middle Eastern backgrounds were more likely to have EGWG than were women of South and East/Southeast Asian backgrounds. These findings are consistent with those from a systematic review of 23 studies that found significant differences in rates of EGWG between ethnic groups (17). However, evidence seems to be limited regarding the contributing factors. Multifactorial causes likely include differences in socioeconomic characteristics, genetics, and cultural food practices.

With the introduction of the International Association of the Diabetes and Pregnancy Study Groups' diagnostic FPG value ( $\geq 5.1$  mmol/L [92 mg/dL]) (18), the finding of a relationship between significantly higher FPG on an oGTT and EGWG found in our study is clinically important. Although the relationship between EGWG and risk of GDM has been well documented (19–22), few studies have investigated the relationship between EGWG and specific oGTT values, as has been done in this study. These findings are consistent with those of one recently published study including 451 participants, which also found an association between EGWG and higher FPG on an oGTT (23). Unfortunately, most randomized controlled trials to date have had limited success in reducing EGWG (24,25) and the development of GDM (25,26). Further studies focusing on reducing or preventing early EGWG are still warranted, as this study suggests that pregnancy outcomes could be improved even if GDM still occurs.

Although the reason for the higher FPG value in those with EGWG is unknown, a plausible explanation can be drawn from the shared associations between type 2 diabetes, obesity, and GDM. Impaired fasting glycemia may be related to hepatic insulin resistance (27), to which adiposity seems to contribute significantly (27). Consequently, the effect of insulin on hepatic glucose output may be dampened in the fasting state (28,29).

In this study, for every additional 2 kg of excessive weight gained during GDM

management, there was a 32% greater likelihood of insulin being initiated, after adjustment for confounders. Few studies have investigated the impact of cEGWG within GDM management on the need for insulin, medication, or both in addition to MNT. Further, to our knowledge, no other study has assessed the impact of cEGWG incrementally as we have done here. However, several recent studies have found a positive relationship between EGWG (based on differing criteria) and worsening glycemic control, higher medication/insulin use, or both (23,26,30).

This study found that for every additional 2 kg gained, there was a 44% increased likelihood of having an LGA infant. This strong relationship occurred despite intensive monitoring and management of blood glucose levels in order to achieve treatment targets. The link between total excessive maternal weight gain and risk of delivering an LGA infant has been well researched (31–35). However, the impact of cEGWG specifically during GDM management is less well understood. EGWG during GDM management may increase fetal growth because of an associated increase in the amounts of circulating free fatty acids and triglycerides in the mother (36–38).

Clinicians may be concerned about recommending the avoidance of weight gain during GDM management (when IOM targets have already been exceeded) for fear of increasing the rate of delivery of SGA infants. However, the rate of delivery of SGA infants was not significantly higher among those who either lost or maintained weight during GDM management than among those with cEGWG (7.0% vs. 4.6%;  $P = 0.192$ ). Further, rates of having an SGA infant among all the groups in this study were below the expected background risk of 10% (14). However, it would be prudent to promote consumption of a healthy, balanced diet that meets the nutritional requirements of pregnancy in conjunction with providing any gestational weight gain advice and support.

This study has a number of strengths. To our knowledge, it is the first analysis to investigate the impact of early EGWG before GDM diagnosis and of cEGWG during GDM treatment, which involved the same diagnostic criteria and treatment targets through the data collection period. Second, this single-center study

had the same leading clinician (J.R.F.) and used the same standardized protocols throughout the data collection period, thereby minimizing clinical variation. Finally, the sample size is large.

This study also has a number of limitations. The findings may not be generalizable to all women with GDM, as this is a cohort of women with various ethnic backgrounds, significant socioeconomic disadvantage, and a high rate of GDM. However, given that GDM is now prevalent worldwide, the range of high-risk ethnic groups represented in this study may make these findings more transferable to a significant proportion of high-risk ethnic groups. Further, the four main ethnic groups represented in our population were entered into the logistic regression model in order to determine independent predictors of insulin therapy. None of the ethnicities confounded the associations found between cEGWG and the likelihood of requiring insulin therapy. Another limitation is the lack of neonatal intensive care data. In addition, the retrospective, observational study design carries several limitations including being unable to attribute causality. Although maternal weight gain was associated with greater insulin requirements, the former may not be causal, particularly given the weight gain-inducing properties of insulin therapy. Also, the possibility of residual confounding cannot be completely excluded and could have influenced the associations we observed. However, the sample size is large, and a number of confounders (including maternal age, gestational age at GDM diagnosis, FPG on the 75-g oGTT, ethnicity, and HbA<sub>1c</sub> at presentation to the Diabetes Centre) were taken into account in the analysis.

In conclusion, a positive clinical message can be taken from our findings. In those who have already exceeded IOM weight gain targets by the time they present with GDM, these results suggest that the “window of opportunity” has not passed to intervene positively by preventing cEGWG during GDM management. Further, the strengths of the associations observed here suggest a need to provide stronger support for women to achieve healthy maternal weight gain (6) both before and during GDM management, as doing so may have multiple potential benefits. Reducing EGWG may reduce the risk of GDM by



lowering the FPG value on a 75-g oGTT and may decrease insulin requirements and adverse pregnancy outcomes in women with GDM. Reducing both EGWG and cEGWG could reduce rates of delivering LGA infants and the associated complications, as well as related health care expenses. Further, given that commencing and titrating insulin are both costly in terms of time and resources, there is also the potential to conserve clinical time and health care expenditure with lower insulin requirements. Weight management during GDM treatment could also reduce postpartum BMI—a significant benefit in these women, who are at high risk of GDM recurrence (39) and type 2 diabetes (40). All these potential benefits need to be more definitively investigated in well-designed and adequately powered randomized controlled trials.

**Acknowledgments.** The authors thank the following diabetes educators who have collected data and maintained the database over the 23 years of data collection for this study: Nicole Edghill, Catherine Finneran, Catherine Fung, Michelle Griffiths, Gael Holters, Margaret Horne, Jessica Mackenzie, Rickie Myska, Ann O'Neill, Adedapo Oni, Jane Payne, Megan Stephens, Carolien van Geloven, Jean Warrender, and Andrew Watt, all from the Diabetes Centre, Bankstown-Lidcombe Hospital, Bankstown, NSW, Australia. The authors also thank Professor Jason Gardosi, Director of the West Midlands Perinatal Institute, Birmingham, U.K., for allowing use of the customized percentile chart calculator.

**Duality of Interest.** No potential conflicts of interest relevant to this article were reported.

**Author Contributions.** R.A.B. conceived and designed the study, performed background research, interpreted the data, and wrote and edited the manuscript. T.W. conceived and designed the study, analyzed and interpreted data, provided statistical expertise, and critically revised the manuscript. G.P.R. interpreted the data, provided administrative and technical support, and critically revised the manuscript. M.M.G. acquired data, provided administration, and critically reviewed the manuscript. C.E.S. interpreted data and critically revised the manuscript. C.E.C. interpreted data, critically revised the manuscript, and provided administrative and technical support. L.M.-W. interpreted the data and critically revised the manuscript. J.R.F. conceived and designed the study; acquired, analyzed, and interpreted data; provided administrative, technical, and material support; supervised; and critically revised the manuscript. R.A.B., T.W., G.P.R., M.M.G., C.E.S., C.E.C., L.M.-W., and J.R.F. approved the final version of the manuscript. T.W. and J.R.F. are the guarantors of this work and, as such, had full access to all the data in the study and take responsibility

for the integrity of the data and the accuracy of the data analysis.

**Prior Presentation.** This study was presented at the Australasian Diabetes in Pregnancy Society Annual Scientific Meeting, Canberra, New South Wales, Australia, 20–22 October 2017; and at the 9th International Symposium on Diabetes, Hypertension, Metabolic Syndrome and Pregnancy (DIP2017), Barcelona, Spain, 8–12 March 2017.

## References

- Landon MB, Spong CY, Thom E, et al.; Eunice Kennedy Shriver National Institute of Child Health and Human Development Maternal-Fetal Medicine Units Network. A multicenter, randomized trial of treatment for mild gestational diabetes. *N Engl J Med* 2009;361:1339–1348
- Crowther CA, Hillier JE, Moss JR, McPhee AJ, Jeffries WS, Robinson JS; Australian Carbohydrate Intolerance Study in Pregnant Women (ACHOIS) Trial Group. Effect of treatment of gestational diabetes mellitus on pregnancy outcomes. *N Engl J Med* 2005;352:2477–2486
- Bogdanet D, Egan A, Reddin C, Kirwan B, Carmody L, Dunne F. ATLANTIC DIP: despite insulin therapy in women with IADPSG diagnosed GDM, desired pregnancy outcomes are still not achieved. What are we missing? *Diabetes Res Clin Pract* 2018;136:116–123
- Benhalima K, Robyns K, Van Crombrugge P, et al. Differences in pregnancy outcomes and characteristics between insulin- and diet-treated women with gestational diabetes. *BMC Pregnancy Childbirth* 2015;15:271
- Brunner S, Stecher L, Ziebarth S, et al. Excessive gestational weight gain prior to glucose screening and the risk of gestational diabetes: a meta-analysis. *Diabetologia* 2015;58:2229–2237
- Rasmussen KM, Yaktine AL, eds.; Institute of Medicine; National Research Council Committee to Reexamine IOM Pregnancy Weight Guidelines. *Weight Gain During Pregnancy: Reexamining the Guidelines*. Washington, DC, National Academies Press, 2009
- Goldstein RF, Abell SK, Ranasinha S, et al. Association of gestational weight gain with maternal and infant outcomes: a systematic review and meta-analysis. *JAMA* 2017;317:2207–2225
- Egan AM, Dennedy MC, Al-Ramli W, Heerey A, Avalos G, Dunne F. ATLANTIC-DIP: excessive gestational weight gain and pregnancy outcomes in women with gestational or pregestational diabetes mellitus. *J Clin Endocrinol Metab* 2014;99:212–219
- Wong T, Barnes RA, Ross GP, Cheung NW, Flack JR. Are the Institute of Medicine weight gain targets applicable in women with gestational diabetes mellitus? *Diabetologia* 2017;60:416–423
- Cundy T, Holt RIG. Gestational diabetes: paradigm lost? *Diabet Med* 2017;34:8–13
- Hoffman L, Nolan C, Wilson JD, Oats JJ, Simmons D; The Australasian Diabetes in Pregnancy Society. Gestational diabetes mellitus—management guidelines. *Med J Aust* 1998;169:93–97
- Martin FIR; Ad Hoc Working Party. The diagnosis of gestational diabetes. *Med J Aust* 1991;155:112
- Hui AL, Sevenhuysen G, Harvey D, Salamon E. Stress and anxiety in women with gestational diabetes during dietary management. *Diabetes Educ* 2014;40:668–677
- Gardosi J, Francis A. Customised weight centile calculator – GROW-Centile v5.15/6.4, 2009. Gestation Network [Internet]. Available from www.gestation.net. Accessed 20 June 2017
- Barbour LA. Weight gain in pregnancy: is less truly more for mother and infant? *Obstet Med* 2012;5:58–64
- Deputy NP, Sharma AJ, Kim SY, Olson CK. Achieving appropriate gestational weight gain: the role of healthcare provider advice. *J Womens Health (Larchmt)* 2018;27:552–560
- Goldstein RF, Abell SK, Ranasinha S, et al. Gestational weight gain across continents and ethnicity: systematic review and meta-analysis of maternal and infant outcomes in more than one million women. *BMC Med* 2018;16:153
- Metzger BE, Gabbe SG, Persson B, et al.; International Association of Diabetes and Pregnancy Study Groups Consensus Panel. International Association of Diabetes and Pregnancy Study Groups recommendations on the diagnosis and classification of hyperglycemia in pregnancy. *Diabetes Care* 2010;33:676–682
- Hedderson MM, Gunderson EP, Ferrara A. Gestational weight gain and risk of gestational diabetes mellitus. *Obstet Gynecol* 2010;115:597–604
- Carreno CA, Clifton RG, Hauth JC, et al.; Eunice Kennedy Shriver National Institute of Child Health and Human Development (NICHD) Maternal-Fetal Medicine Units (MFMU) Network. Excessive early gestational weight gain and risk of gestational diabetes mellitus in nulliparous women. *Obstet Gynecol* 2012;119:1227–1233
- Morisette AS, Tchernof A, Dubé MC, Veillette J, Weisnagel SJ, Robitaille J. Weight gain measures in women with gestational diabetes mellitus. *J Womens Health (Larchmt)* 2011;20:375–380
- Park S, Kim MH, Kim SH. Early gestational weight gains within current recommendations result in increased risk of gestational diabetes mellitus among Korean women. *Diabetes Metab Res Rev* 2014;30:716–725
- Komem D, Salman L, Krispin E, et al. Gestational weight gain and weight loss among women with gestational diabetes mellitus. *Diabetes Res Clin Pract* 2018;141:88–97
- Skouteris H, Hartley-Clark L, McCabe M, et al. Preventing excessive gestational weight gain: a systematic review of interventions. *Obes Rev* 2010;11:757–768
- Simmons D, Jelsma JG, Galjaard S, et al. Results from a European multicenter randomized trial of physical activity and/or healthy eating to reduce the risk of gestational diabetes mellitus: the DALI lifestyle pilot. *Diabetes Care* 2015;38:1650–1656
- Feghali M, Twedt R, Catov J, et al. Patterns of gestational weight gain and pregnancy outcomes among women with gestational diabetes. *Am J Obstet Gynecol* 2017;216:S322–S323
- Abdul-Ghani MA, Tripathy D, DeFronzo RA. Contributions of  $\beta$ -cell dysfunction and insulin resistance to the pathogenesis of impaired glucose tolerance and impaired fasting glucose. *Diabetes Care* 2006;29:1130–1139
- Kabir M, Catalano KJ, Ananthnarayan S, et al. Molecular evidence supporting the portal theory: a causative link between visceral adiposity and hepatic insulin resistance. *Am J*

- Physiol Endocrinol Metab 2005;288:E454–E461
29. Meyer C, Pimenta W, Woerle HJ, et al. Different mechanisms for impaired fasting glucose and impaired postprandial glucose tolerance in humans. *Diabetes Care* 2006;29:1909–1914
30. Aiken CEM, Hone L, Murphy HR, Meek CL. Improving outcomes in gestational diabetes: does gestational weight gain matter? *Diabet Med* 2019;36:167–176
31. Barnes RA, Edghill N, Mackenzie J, et al. Predictors of large and small for gestational age birthweight in offspring of women with gestational diabetes mellitus. *Diabet Med* 2013;30:1040–1046
32. Alberico S, Montico M, Barresi V, et al.; Multicentre Study Group on Mode of Delivery in Friuli Venezia Giulia. The role of gestational diabetes, pre-pregnancy body mass index and gestational weight gain on the risk of newborn macrosomia: results from a prospective multicentre study. *BMC Pregnancy Childbirth* 2014;14:23
33. Black MH, Sacks DA, Xiang AH, Lawrence JM. The relative contribution of prepregnancy overweight and obesity, gestational weight gain, and IADPSG-defined gestational diabetes mellitus to fetal overgrowth. *Diabetes Care* 2013;36:56–62
34. Nohr EA, Vaeth M, Baker JL, Sørensen Tla, Olsen J, Rasmussen KM. Combined associations of prepregnancy body mass index and gestational weight gain with the outcome of pregnancy. *Am J Clin Nutr* 2008;87:1750–1759
35. Cedergren M. Effects of gestational weight gain and body mass index on obstetric outcome in Sweden. *Int J Gynaecol Obstet* 2006;93:269–274
36. Kurtzhals LL, Nørgaard SK, Secher AL, et al. The impact of restricted gestational weight gain by dietary intervention on fetal growth in women with gestational diabetes mellitus. *Diabetologia* 2018;61:2528–2538
37. Schaefer-Graf UM, Graf K, Kulbacka I, et al. Maternal lipids as strong determinants of fetal environment and growth in pregnancies with gestational diabetes mellitus. *Diabetes Care* 2008;31:1858–1863
38. Barrett HL, Dekker Nitert M, McIntyre HD, Callaway LK. Normalizing metabolism in diabetic pregnancy: is it time to target lipids? *Diabetes Care* 2014;37:1484–1493
39. Wong VW, Chong S, Chenn R, Jalaludin B. Factors predicting recurrence of gestational diabetes in a high-risk multi-ethnic population. *Aust N Z J Obstet Gynaecol*. 1 April 2019 [Epub ahead of print]. DOI: 10.1111/ajo.12973
40. Nehring I, Schmoll S, Beyerlein A, Hauner H, von Kries R. Gestational weight gain and long-term postpartum weight retention: a meta-analysis. *Am J Clin Nutr* 2011;94:1225–1231
